# Supplementary material
Source: MDPI journal article supplement (https://www.mdpi.com/2076-3417/11/4/1704)
Supplement: s1 [file s1]

## Supplementary Materials

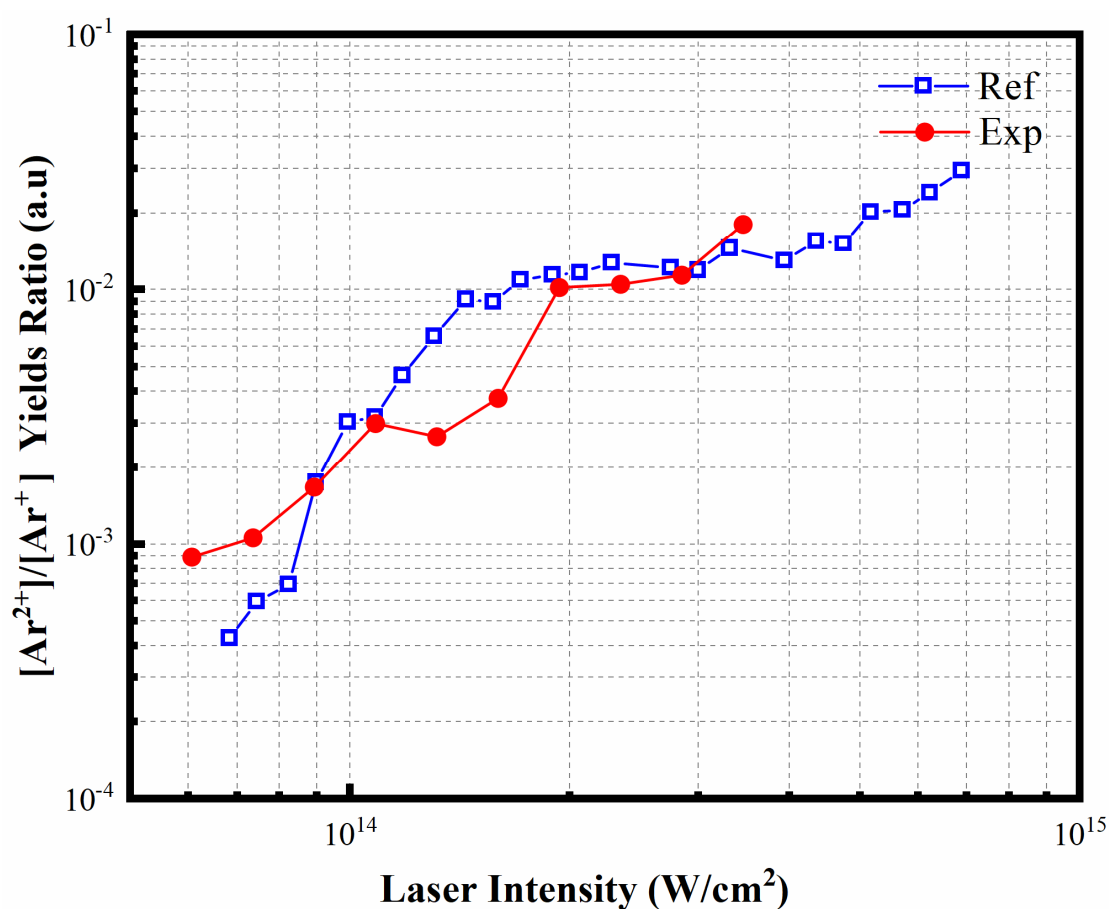

**Figure S1.** The yield ratio of  $[Ar^{2+}]/[Ar^+]$  of our measurement comparing with the same ratio in literatures Ref [1]. The red solid square is the experimental results.

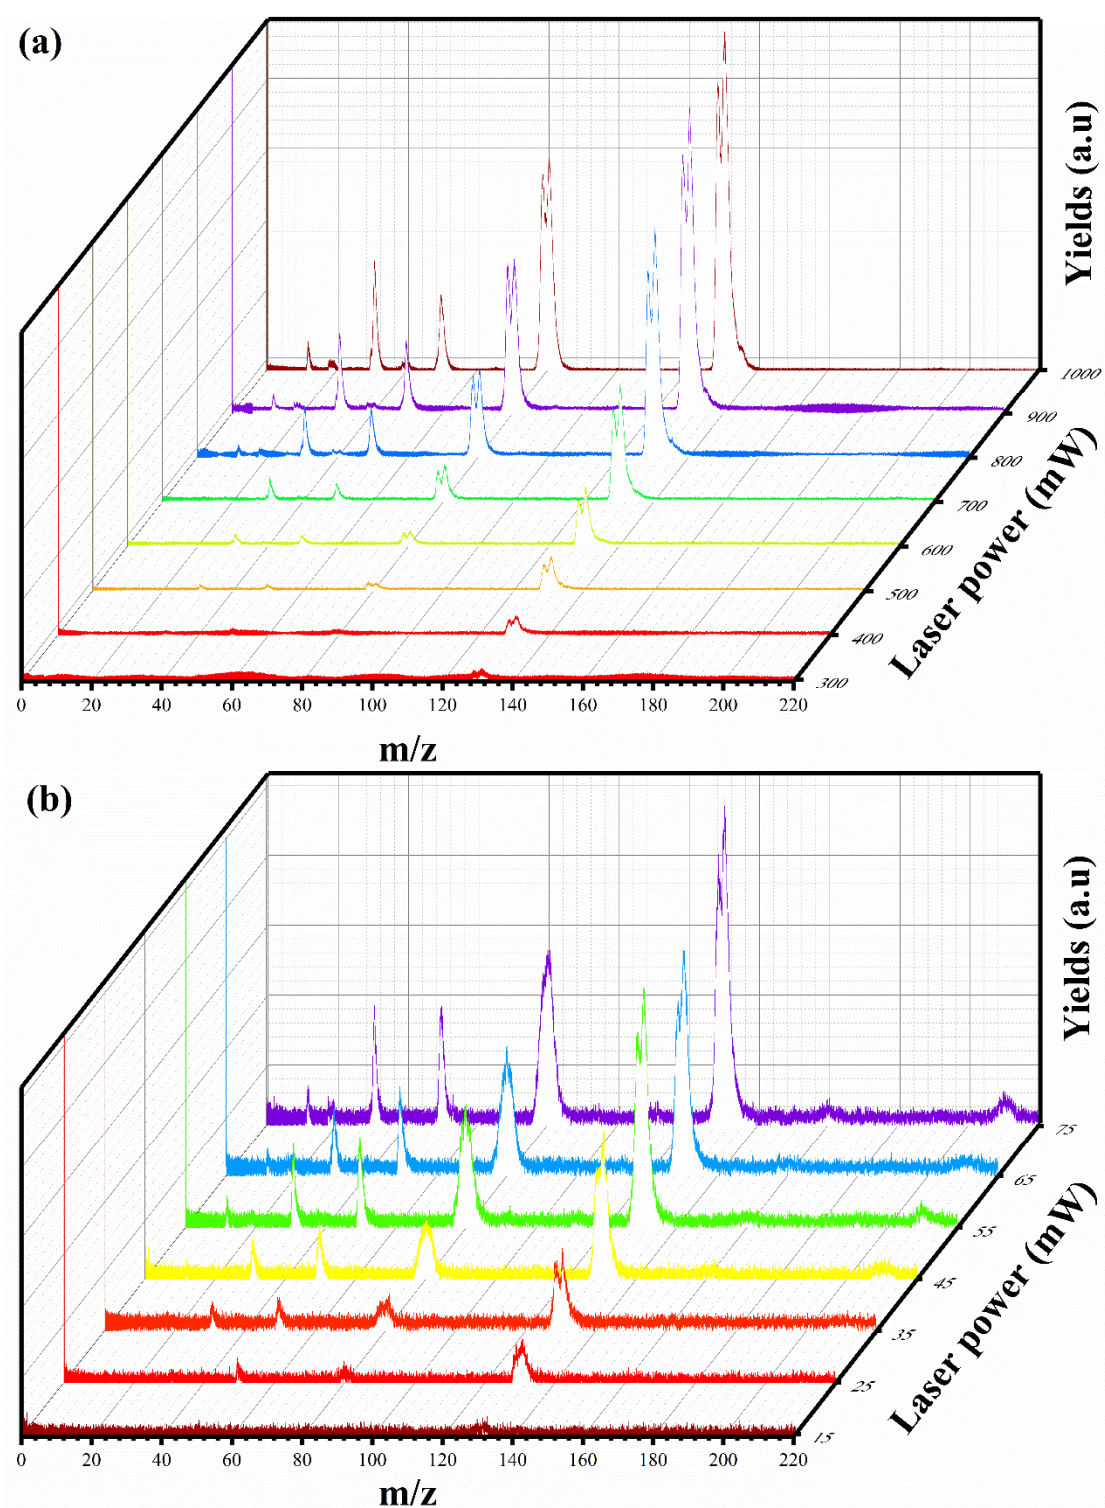

**Figure S2.** The time-of-flight mass spectra under different laser power, in the (a) 800nm laser field; (b) 400nm laser field, respectively.

**Table S1.** The compliance matrix of singly charged ion  $\text{CF}_2\text{Br}_2^+$  and  $\text{CF}_2\text{Br}^+$ , which is calculated by B3LYP level of theory using 6-31G\* basis set.

| Bond    | $\text{CF}_2\text{Br}_2^+$ |        |         |         | $\text{CF}_2\text{Br}^+$ |         |
|---------|----------------------------|--------|---------|---------|--------------------------|---------|
|         | C-F(2)                     | C-F(3) | C-Br(4) | C-Br(5) | C-F(2)                   | C-Br(4) |
| C-F(2)  | 0.142                      |        |         |         | 0.113                    |         |
| C-F(3)  | -0.012                     | 0.142  |         |         | -0.012                   | 0.113   |
| C-Br(4) | -0.033                     | -0.033 | 0.688   |         | -0.016                   | -0.012  |
| C-Br(5) | -0.033                     | -0.033 | -0.212  | 0.688   |                          | 0.239   |

(a)

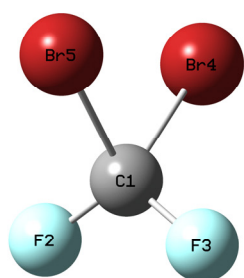

C-F: 7.04 mdyn/Å  
C-Br: 1.45 mdyn/Å

(b)

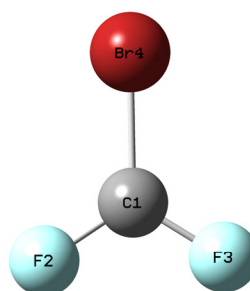

C-F: 8.85 mdyn/Å  
C-Br: 4.18 mdyn/Å

**Figure S3.** (a) the optimized structure of singly charged ion  $\text{CF}_2\text{Br}_2^+$  at the B3LYP/6-31G\* level and the related C-F and C-Br bonds strength calculated by the relax force constant (b) the optimized structure of singly charged ion  $\text{CF}_2\text{Br}^+$  at the B3LYP/6-31G\* level and the related C-F and C-Br bonds strength calculated by the relax force constant[2].

## Reference

1. Guo, C.; Li, M.; Nibarger, J. P.; Gibson, G. N., *Physical Review A* 1998, 58, R4271-R4274.
2. Brandhorst, K.; Grunenberg, J., *Chemical Society Reviews* 2008, 37, 1558.
